# Supplementary material
Source: PubMed Central journal article supplement (PMC1954653)
Supplement: annrheumd_ard.2006.062042_1.pdf [file annrheumd_ard.2006.062042_1.pdf]

**Supplementary Table. Histomorphological grading and T/B cell segregation**

| Patient | n (%) of lymphoid aggregates |            |            | n (%) of T/B segregated aggregates |            |           |
|---------|------------------------------|------------|------------|------------------------------------|------------|-----------|
|         | Grade 1                      | Grade 2    | Grade 3    | Grade 1                            | Grade 2    | Grade 3   |
| 1       | 0 (0%)                       | 0 (0%)     | 0 (0%)     | 0 (0%)                             | 0 (0%)     | 0 (0%)    |
| 2       | 0 (0%)                       | 0 (0%)     | 0 (0%)     | 0 (0%)                             | 0 (0%)     | 0 (0%)    |
| 3       | 1 (100%)                     | 0 (0%)     | 0 (0%)     | 0 (0%)                             | 0 (0%)     | 0 (0%)    |
| 4       | 5 (83.3%)                    | 1 (16.7%)  | 0 (0%)     | 0 (0%)                             | 0 (0%)     | 0 (0%)    |
| 5       | 2 (100%)                     | 0 (0%)     | 0 (0%)     | 0 (0%)                             | 0 (0%)     | 0 (0%)    |
| 6       | 9 (100%)                     | 0 (0%)     | 0 (0%)     | 3 (100%)                           | 0 (0%)     | 0 (0%)    |
| 7       | 1 (20%)                      | 4 (80%)    | 0 (0%)     | 0 (0%)                             | 4 (100%)   | 0 (0%)    |
| 8       | 13 (100%)                    | 0 (0%)     | 0 (0%)     | 2 (100%)                           | 0 (0%)     | 0 (0%)    |
| 9       | 5 (41.7%)                    | 7 (58.3%)  | 0 (0%)     | 1 (25%)                            | 2 (75%)    | 0 (0%)    |
| 10      | 3 (27.3%)                    | 8 (72.7%)  | 0 (0%)     | 1 (25%)                            | 2 (75%)    | 0 (0%)    |
| 11      | 2 (40%)                      | 2 (40%)    | 1 (20%)    | 1 (33.3%)                          | 1 (33.3%)  | 1 (33.3%) |
| 12      | 6 (60%)                      | 3 (30%)    | 1 (10%)    | 2 (50%)                            | 1 (25%)    | 1 (25%)   |
| 13      | 7 (58.3%)                    | 3 (25%)    | 2 (16.7%)  | 2 (33.3%)                          | 2 (33.3%)  | 2 (33.3%) |
| 14      | 7 (43.75%)                   | 7 (43.75%) | 2 (12.5%)  | 5 (35.7%)                          | 7 (50%)    | 2 (14.3%) |
| 15      | 3 (33.3%)                    | 3 (33.3%)  | 3 (33.3%)  | 1 (16.7%)                          | 2 (33.3%)  | 3 (50%)   |
| 16      | 45 (62.5%)                   | 6 (8.3%)   | 21 (29.2%) | 3 (14.3%)                          | 10 (47.6%) | 8 (38.1%) |
| 17      | 2 (16.7%)                    | 4 (33.3%)  | 6 (50%)    | 0 (0%)                             | 3 (42.9%)  | 4 (57.1%) |
| 18      | 2 (16.7%)                    | 9 (75%)    | 1 (8.3%)   | 1 (12.5%)                          | 6 (75%)    | 1 (12.5%) |
| 19      | 4 (80%)                      | 1 (20%)    | 0 (0%)     | 0 (0%)                             | 0 (0%)     | 0 (0%)    |
| 20      | 14 (19.7%)                   | 30 (42.3%) | 27 (38%)   | 6 (16.2%)                          | 21 (56.8%) | 10 (27%)  |
| 21      | 3 (12%)                      | 16 (64%)   | 6 (24%)    | 3 (13%)                            | 15 (65.2%) | 5 (21.8%) |
| 22      | 1 (100%)                     | 0 (0%)     | 0 (0%)     | 0 (0%)                             | 0 (0%)     | 0 (0%)    |
| 23      | 9 (56.25%)                   | 6 (37.5%)  | 1 (6.25%)  | 0 (0%)                             | 3 (75%)    | 1 (25%)   |
| 24      | 8 (33.4%)                    | 11 (45.8%) | 5 (20.8%)  | 8 (42.1%)                          | 6 (31.6%)  | 5 (26.3%) |
| 25      | 25 (67.6%)                   | 8 (21.6%)  | 4 (10.8%)  | 10 (62.5%)                         | 2 (12.5%)  | 4 (25%)   |
| 26      | 37 (69.8%)                   | 15 (28.3%) | 1 (1.9%)   | 7 (63.6%)                          | 4 (36.4%)  | 0 (0%)    |
| 27      | 6 (54.5%)                    | 2 (18.2%)  | 3 (27.3%)  | 6 (66.7%)                          | 0 (0%)     | 3 (33.3%) |
| Total   | 220                          | 146        | 84         | 62                                 | 91         | 50        |
